# Supplementary material
Source: publisher figshare collection journal article supplement (https://karger.figshare.com/ndownloader/files/35989781)
Supplement: Supplementary file 1 [file 35989781]

**Supplementary Table 1 –** List of all microorganisms identified in the cohort.

|  | Vaginal Swab, n(%)  N= 58 | UCU, n (%)  N=44 |
| --- | --- | --- |
| *S. Agalactiae* | 12 (21%) | 5 (11%) |
| *E. Coli* | 7 (12%) | 12 (27%) |
| *U. Urealitycum* | 14 (24%) | / |
| *C. Albicans* | 10 (17%) | 6 (14%) |
| *C. Glabrata or Krusei* | 3 (5%) | 4 (9%) |
| *E. Faecalis* | 2 (3%) | 8 (18%) |
| *U. Urealitycum+M. Hominis* | 2 (3%) | / |
| *S. Aureus* | 2 (3%) | / |
| *P. Mirabilis* | 2 (3%) | 2 (5%) |
| *E. Aerogenes* | 1 (2%) | / |
| More than one germ identified | 3 (5%) | 7 (16%) |

UCU: Urine culture
